# Supplementary material for: Selective C–C Bond Cleavage in Diols and Lignin Models: High-Throughput Screening of Metal Oxide-Anchored Vanadium in Mesoporous Silica
Source: MDPI journal article supplement (doi:10.3390/catal11080901), 2021-07-26
Supplement: s1 [file s1]

# Supplementary Information

## Selective C–C Bond Cleavage in Diols and Lignin Models: High-Throughput Screening of Metal Oxide-Anchored Vanadium in Mesoporous Silica

Xinnan Lu <sup>1,2,3</sup>, Roxanne Clément <sup>2</sup>, Yong Lu <sup>3</sup>, Belén Albela <sup>1</sup>, R. Tom Baker <sup>2,\*</sup> and Laurent Bonneviot <sup>1,\*</sup>

<sup>1</sup> Laboratoire de Chimie, Ecole Normale Supérieure de Lyon, Université de Lyon, 46 Allée d'Italie,

CEDEX 07, 69364 Lyon, France; xinnan.lu@ku.ac.ae (X.L.); belen.albela@ens-lyon.fr (B.A.)

<sup>2</sup> Department of Chemistry and Biomolecular Sciences and Centre for Catalysis Research and Innovation, University of Ottawa, Ottawa, ON K1N 6N5, Canada; r.clement@uottawa.ca

<sup>3</sup> School of Chemistry and Molecular Engineering, East China Normal University, No. 3663 North Zhongshan Road, Shanghai 200062, China; ylu@chem.ecnu.edu.cn

\* Correspondence: rbaker@uottawa.ca (R.T.B.); laurent.bonneviot@ens-lyon.fr (L.B.); Tel.: +1-613-562-5800 (ext. 7108) (R.T.B.); +33-472-72-83-91 (L.B.)

### Table of Contents

|                                                                                                                                      |    |
|--------------------------------------------------------------------------------------------------------------------------------------|----|
| <b>Figure S1.</b> Low-angle XRD patterns of as-made <b>1V-MS-L</b> and <b>1V-MS-L-cal</b> samples.....                               | 3  |
| <b>Figure S2a.</b> Low-angle XRD patterns of <b>VTi-MS-T-cal</b> .....                                                               | 3  |
| <b>Figure S2b.</b> Low-angle XRD patterns of <b>VAI-MS-L-cal</b> .....                                                               | 4  |
| <b>Figure S2c.</b> Low-angle XRD patterns of <b>VZr-MS-L-cal</b> (left) and <b>VCe-MS-T-cal</b> (right).....                         | 4  |
| <b>Figure S3.</b> TEM images of <b>1V-MS-L-cal</b> .....                                                                             | 5  |
| <b>Figure S4a.</b> N <sub>2</sub> sorption isotherms of <b>MS-L-cal</b> and <b>V-MS-L-cal</b> at 77 K.....                           | 6  |
| <b>Figure S4b.</b> N <sub>2</sub> sorption isotherms of <b>VTi-MS-T-cal</b> at 77 K.....                                             | 6  |
| <b>Figure S4c.</b> N <sub>2</sub> sorption isotherms of <b>VAI-MS-L-cal</b> at 77 K.....                                             | 7  |
| <b>Figure S4d.</b> N <sub>2</sub> sorption isotherms of <b>VZr-MS-L-cal</b> at 77 K.....                                             | 7  |
| <b>Figure S4e.</b> N <sub>2</sub> sorption isotherms of <b>VCe-MS-T-cal</b> at 77 K.....                                             | 7  |
| <b>Figure S5a.</b> <sup>29</sup> Si quantitative NMR spectrum of as-made <b>MS-L</b> .....                                           | 8  |
| <b>Figure S5b.</b> <sup>29</sup> Si quantitative NMR spectrum of as-made <b>(2.5-2.5)VAI-MS-L</b> .....                              | 8  |
| <b>Figure S5c.</b> <sup>27</sup> Al NMR spectrum of as-made <b>5Al-MS-L</b> .....                                                    | 9  |
| <b>Figure S5d.</b> <sup>27</sup> Al NMR spectrum of as-made <b>(1-5)Al-MS-L</b> .....                                                | 9  |
| <b>Figure S6.</b> EPR spectra of vanadium samples with Ti/Al/Zr/Ce anchors. Power = 1mW, Modulation amplitude = 0.1G, T = 120 K..... | 10 |
| <b>Figure S7.</b> FT-IR spectra of as-made <b>V-MS-L</b> and <b>V-MS-L-cal</b> samples.....                                          | 10 |
| <b>Figure S8a.</b> UV-vis spectra of <b>VAI-MS-L-cal</b> samples.....                                                                | 11 |
| <b>Figure S8b.</b> UV-vis spectra of <b>VZr-MS-L-cal</b> (left) and <b>VCe-MS-T-cal</b> , samples.....                               | 11 |

|                                                                                                                                                                                                     |    |
|-----------------------------------------------------------------------------------------------------------------------------------------------------------------------------------------------------|----|
| <b>Figure S9a.</b> Tauc plot and the corresponding edge energy of <b>VTi-MS-T-cal</b> samples based on their UV-vis spectra. $E_g$ obtained by extrapolation of the straight line (black dots)..... | 12 |
| <b>Figure S9b.</b> Tauc plot and the corresponding edge energy of <b>VZr-MS-L-cal</b> samples based on their UV-vis spectra.....                                                                    | 12 |
| <b>Figure S9c.</b> Tauc plot and the corresponding edge energy of <b>VCe-MS-T-cal</b> samples based on their UV-vis spectra.....                                                                    | 13 |
| <b>Figure S10a.</b> Effect of the nature of the Ti anchor on conversion (a) and selectivity in route $a_1$ (b).....                                                                                 | 13 |
| <b>Figure S10b.</b> Effect of the nature of the Zr anchor on conversion (a) and selectivity in route $a_1$ (b).....                                                                                 | 14 |
| <b>Figure S10c.</b> Effect of the nature of the Ce anchor on conversion (a) and selectivity in route $a_1$ (b). ....                                                                                | 14 |
| <b>Table S1.</b> Porosity data derived from $N_2$ adsorption-desorption isotherms for <b>MS-L</b> and <b>V-MS-L-cal</b> samples.....                                                                | 15 |
| <b>Table S2 (a).</b> Porosity data of <b>VTi-MS-T-cal</b> derived from $N_2$ sorption isotherms.....                                                                                                | 15 |
| <b>Table S2 (b).</b> Porosity data of <b>VAI-MS-L-cal</b> derived from $N_2$ sorption isotherms.....                                                                                                | 16 |
| <b>Table S2 (c).</b> Porosity data of <b>VZr-MS-L-cal</b> and <b>VCe-MS-L-cal</b> .....                                                                                                             | 16 |
| <b>Table S3.</b> $^{27}\text{Al}$ NMR analysis of as-prepared <b>Al-MS-L</b> and <b>VAI-MS-L</b> samples.....                                                                                       | 17 |
| <b>Table S4.</b> $^{29}\text{Si}$ quantitative NMR analysis of as-prepared samples with V and Ti/Al/Zr/Ce anchors. ....                                                                             | 17 |
| <b>Table S5a.</b> $E_g$ from Tauc plots of Fig.S10a.....                                                                                                                                            | 18 |
| <b>Table S5b.</b> $E_g$ from Tauc plots of Fig.S10b.....                                                                                                                                            | 18 |
| <b>Table S5c.</b> $E_g$ from Tauc plots of Fig.S10b and Fig 10d.....                                                                                                                                | 19 |
| <b>Table S6a.</b> High throughput screening of 1,2-diphenyl-2-methoxyethanol oxidation using Ti anchoring ions.....                                                                                 | 19 |
| <b>Table S6b.</b> High throughput screening of 1,2-diphenyl-2-methoxyethanol oxidation using Zr and Ce anchoring ions.....                                                                          | 20 |
| <b>Table S7.</b> Oxidation of 1,2-diphenyl-2-methoxyethanol in different solvents via vanadium catalyst <b>(5-1)VAI-MS-L-cal</b> .....                                                              | 20 |
| <b>Table S8.</b> Recycling test of <b>(2.5-2.5)VAI-MS-L-cal</b> for 1,2-diphenyl-2-methoxyethanol oxidation in acetonitrile.....                                                                    | 20 |
| <b>REFERENCES</b> .....                                                                                                                                                                             | 21 |

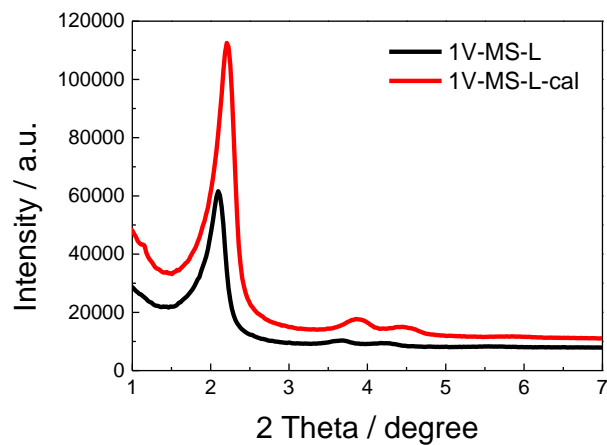

**Figure S1.** Low-angle XRD patterns of as-made **1V-MS-L** and **1V-MS-L-cal** samples.

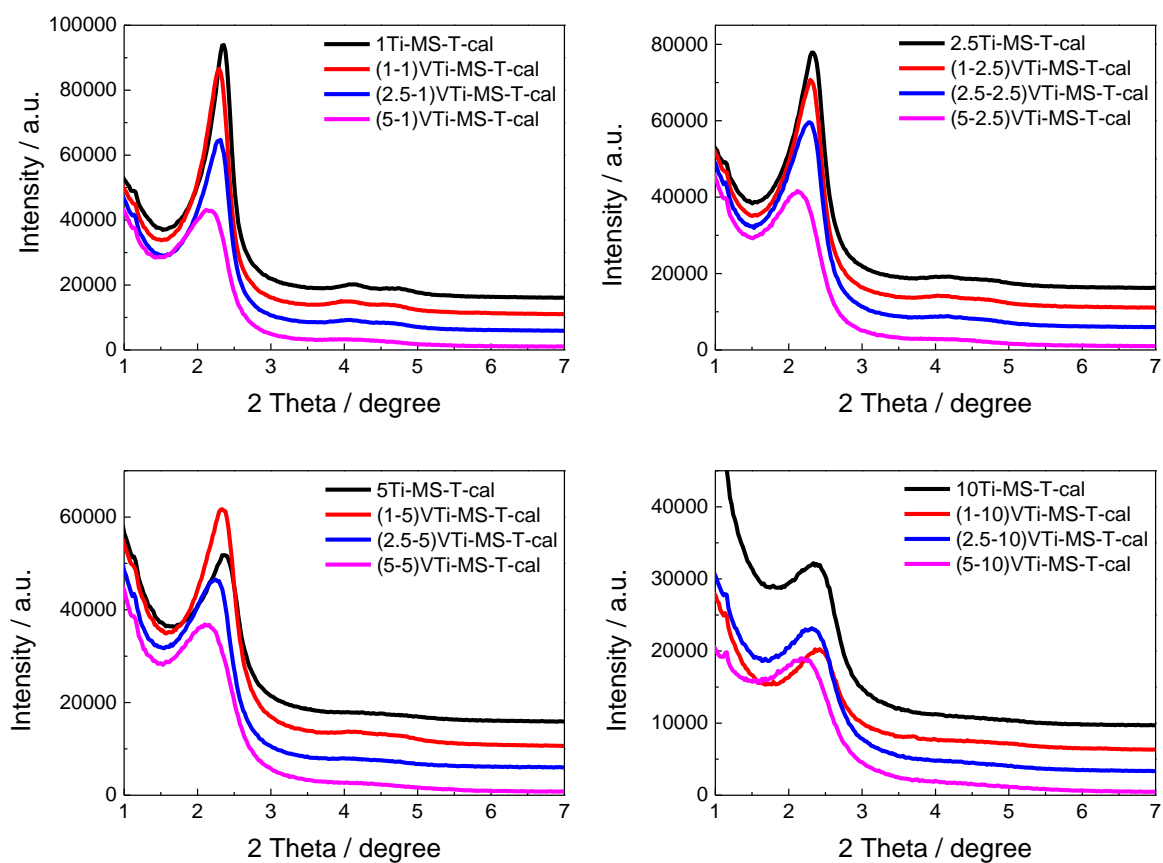

**Figure S2a.** Low-angle XRD patterns of **VTi-MS-T-cal**.

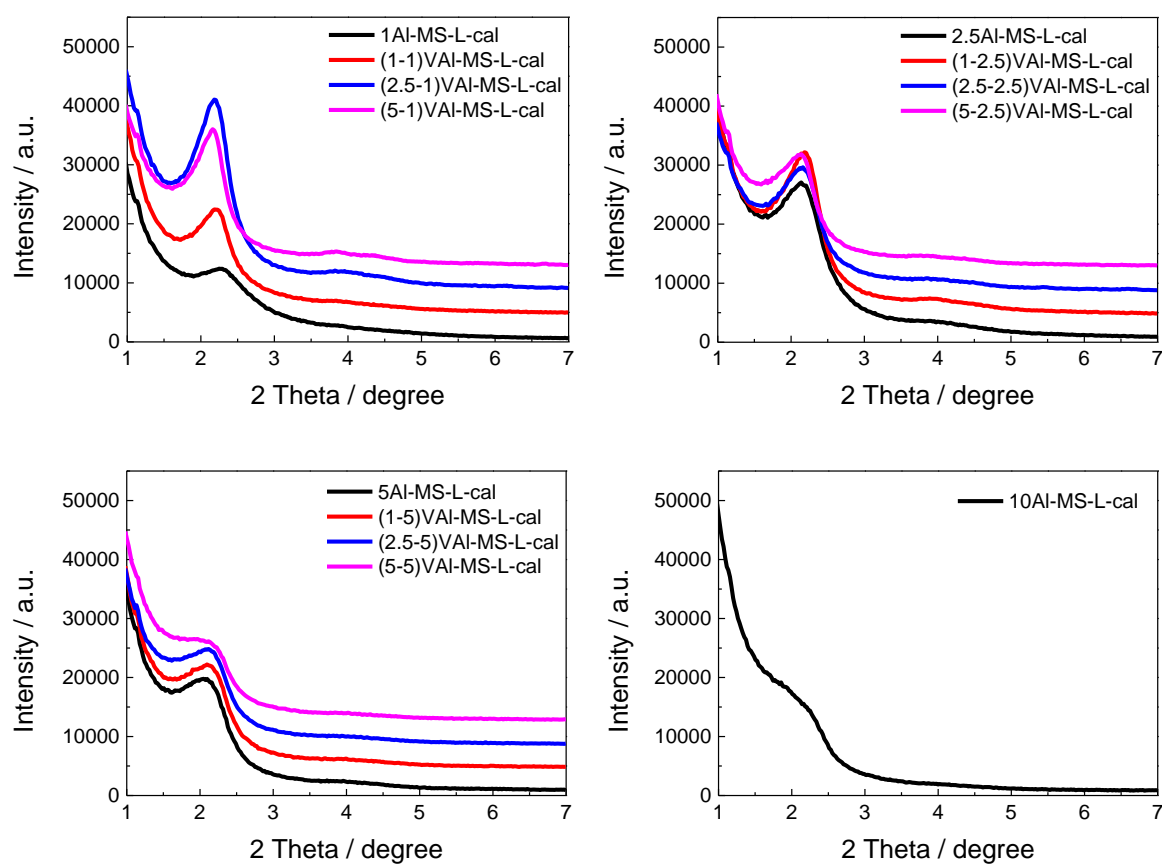

**Figure S2b.** Low-angle XRD patterns of **VAl-MS-L-cal**.

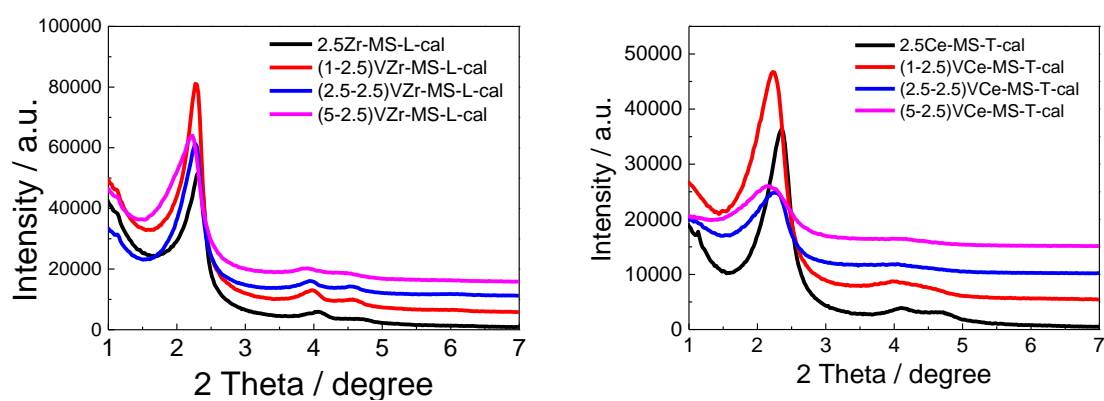

**Figure S2c.** Low-angle XRD patterns of **VZr-MS-L-cal** (left) and **VCe-MS-T-cal** (right).

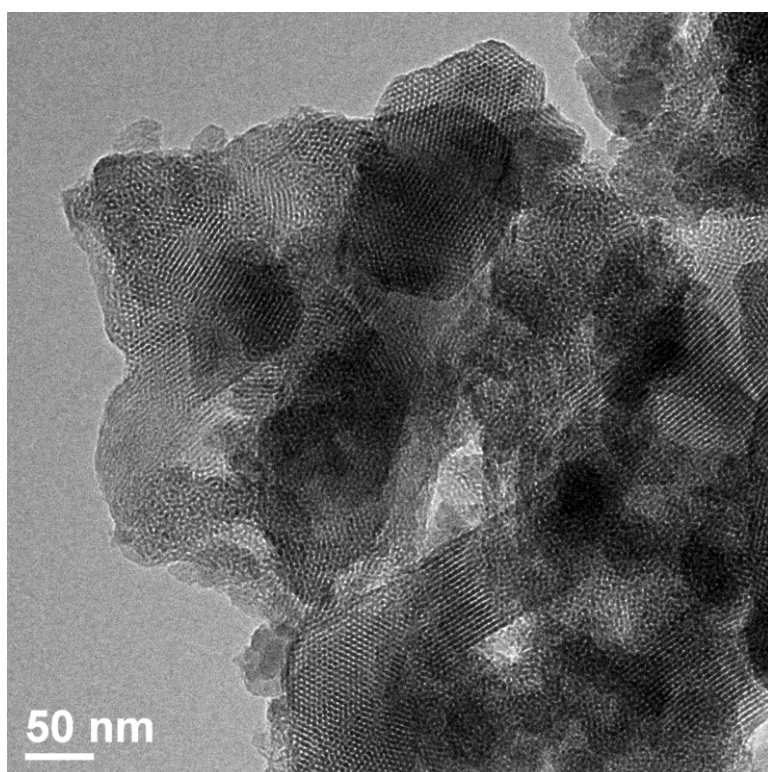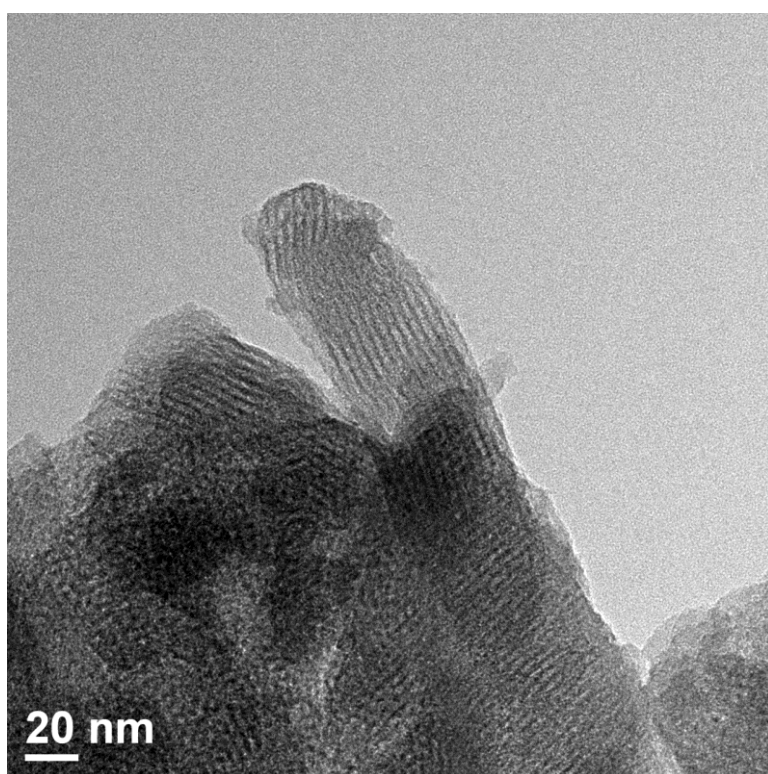

**Figure S3.** TEM images of **1V-MS-L-cal**. The ordered 2D hexagonal honeycomb pores can be observed clearly, the pores possessing a diameter of ca. 3 nm, and a wall thickness of about 1 nm.

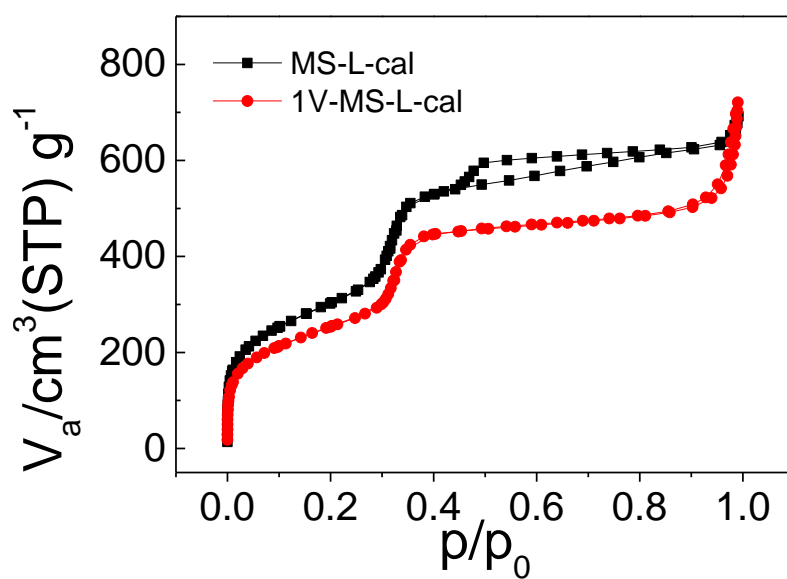

**Figure S4a.**  $\text{N}_2$  sorption isotherms of MS-L-cal and V-MS-L-cal at 77 K.

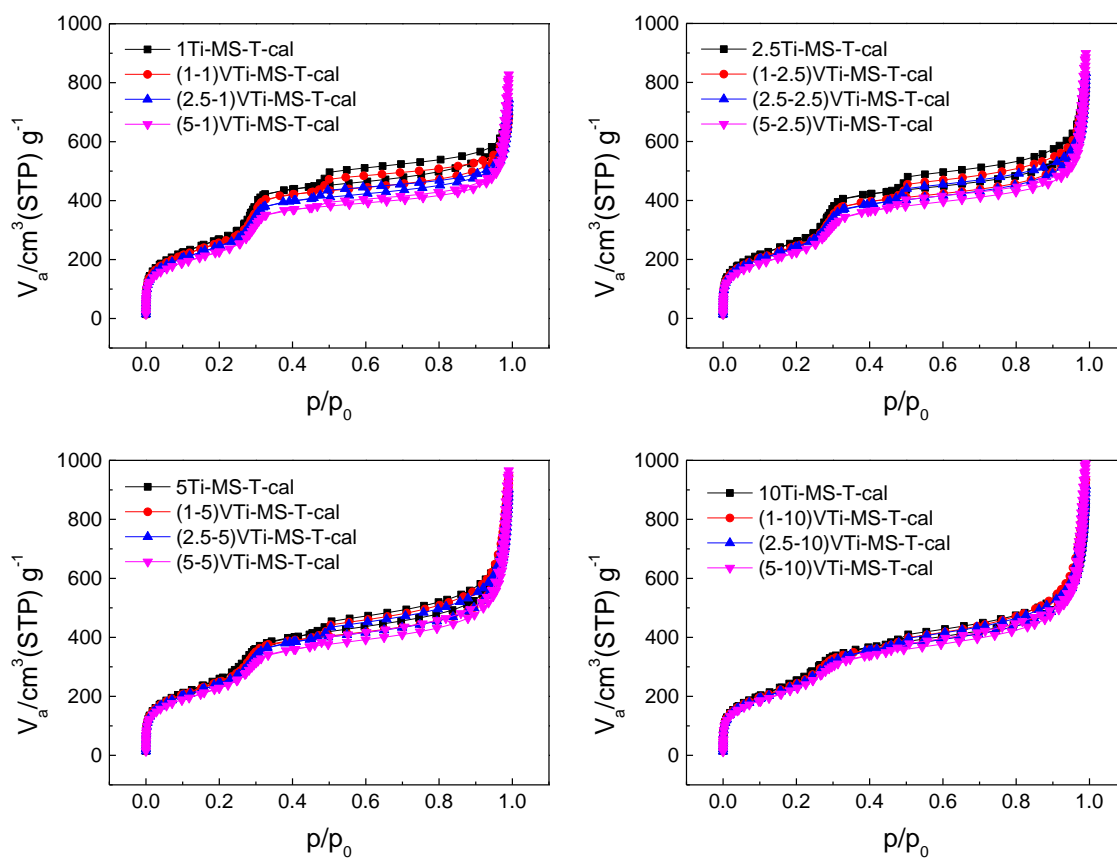

**Figure S4b.**  $\text{N}_2$  sorption isotherms of VTi-MS-T-cal at 77 K.

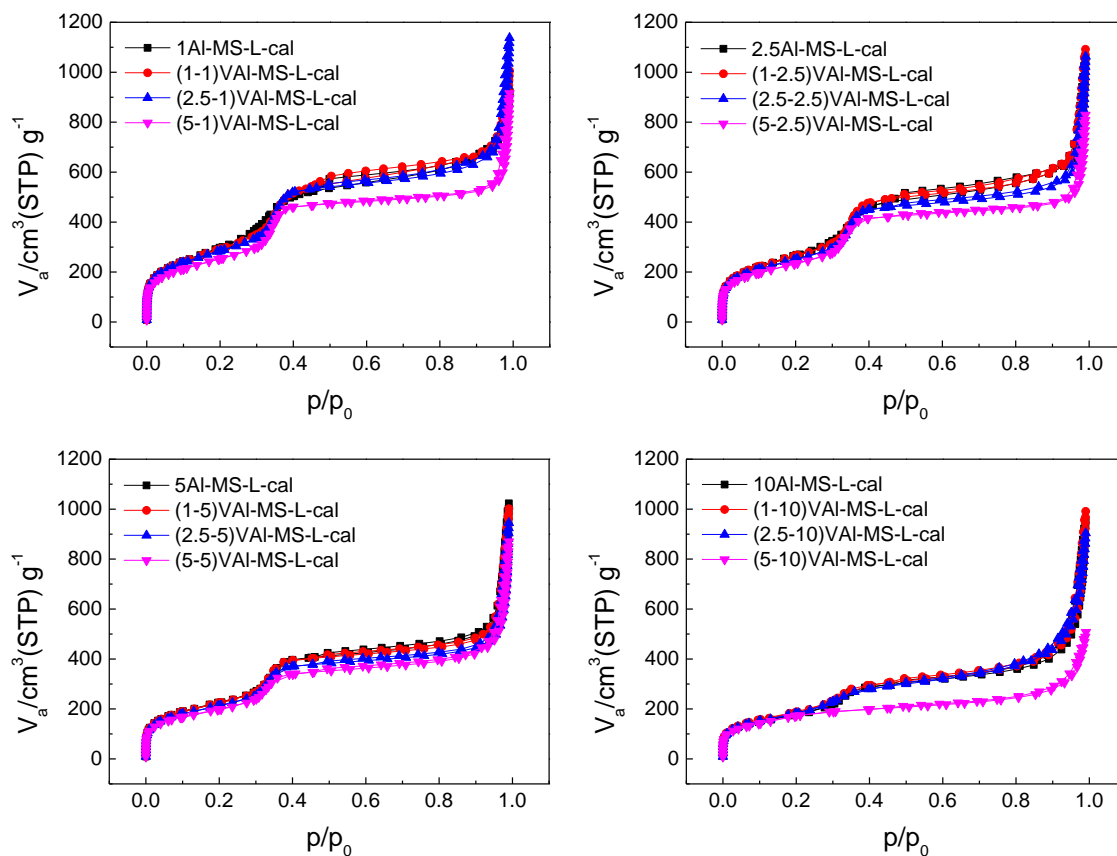

**Figure S4c.**  $N_2$  sorption isotherms of VAl-MS-L-cal at 77 K.

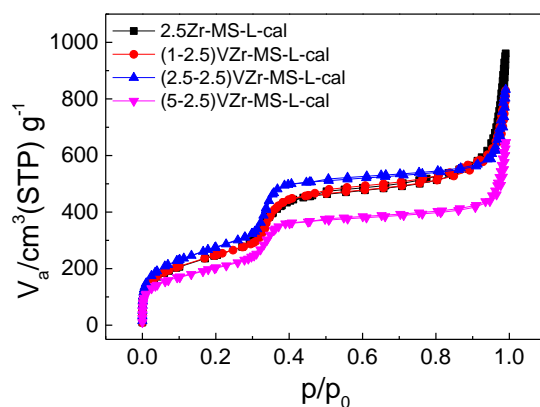

**Figure S4d.**  $N_2$  sorption isotherms of VZr-MS-L-cal at 77 K.

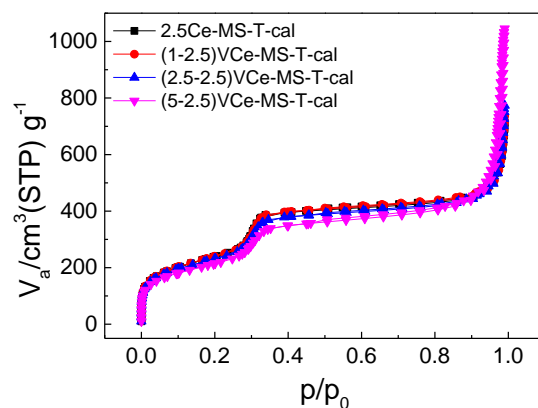

**Figure S4e.**  $N_2$  sorption isotherms of VCe-MS-T-cal at 77 K.

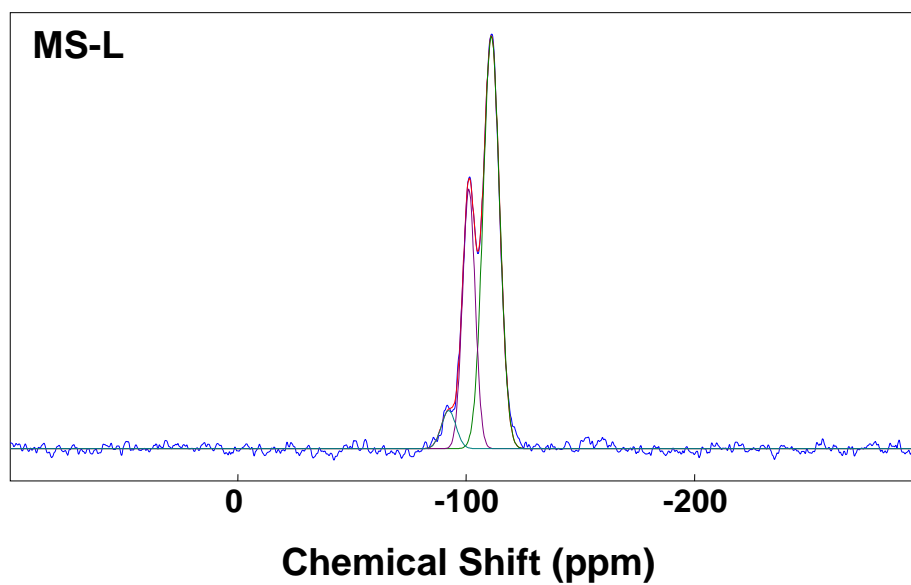

**Figure S5a.**  $^{29}\text{Si}$  quantitative NMR spectrum of as-made **MS-L**.

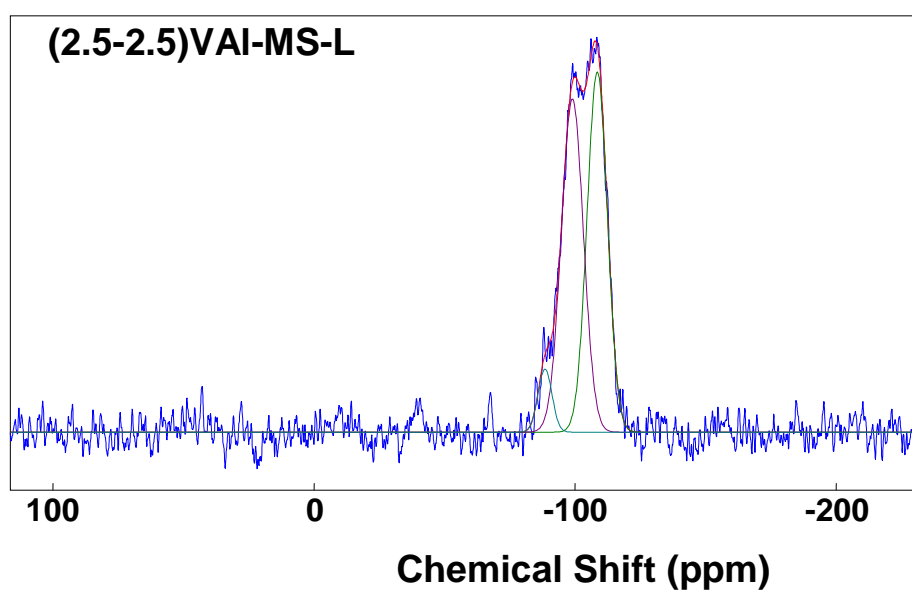

**Figure S5b.**  $^{29}\text{Si}$  quantitative NMR spectrum of as-made **(2.5-2.5)VAI-MS-L**.



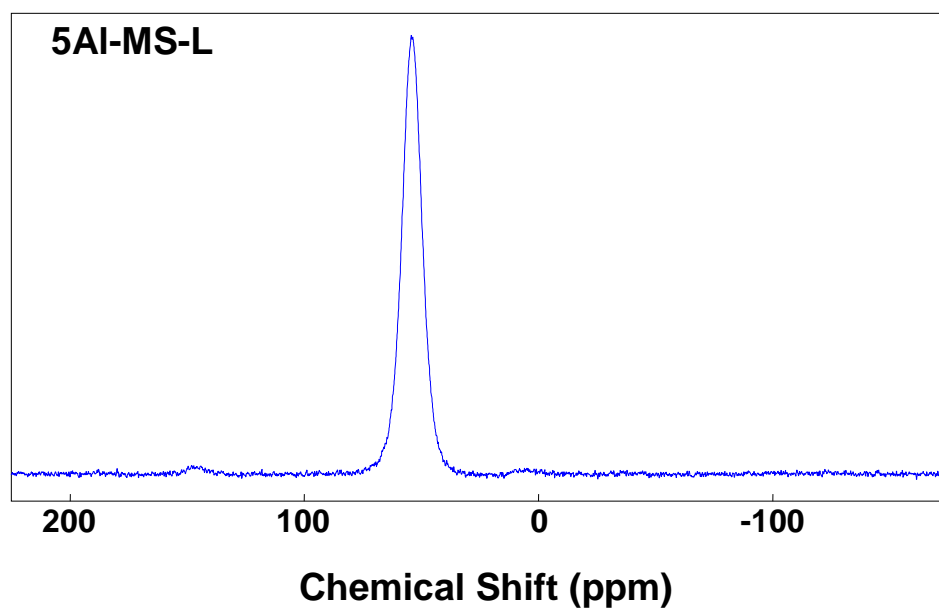

**Figure S5c.**  $^{27}\text{Al}$  NMR spectrum of as-made 5Al-MS-L.

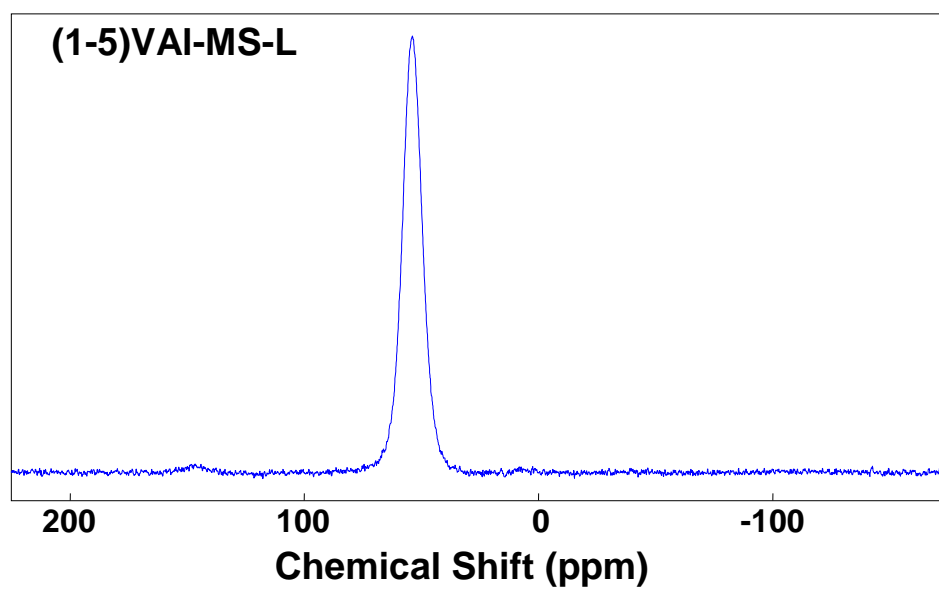

**Figure S5d.**  $^{27}\text{Al}$  NMR spectrum of as-made (1-5)Al-MS-L.

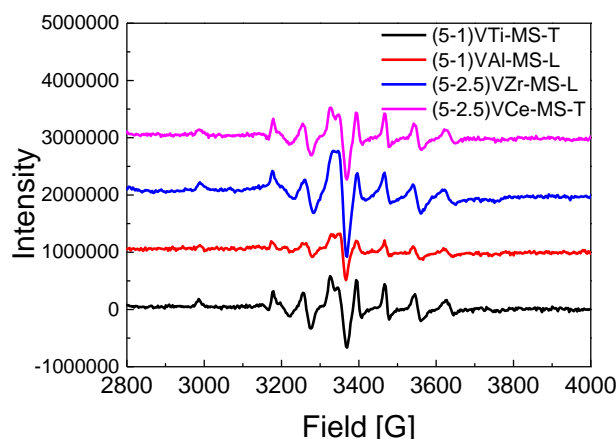

**Figure S6.** EPR spectra of vanadium samples with Ti/Al/Zr/Ce anchors. Power = 1mW, Modulation amplitude = 0.1G, T = 120 K.

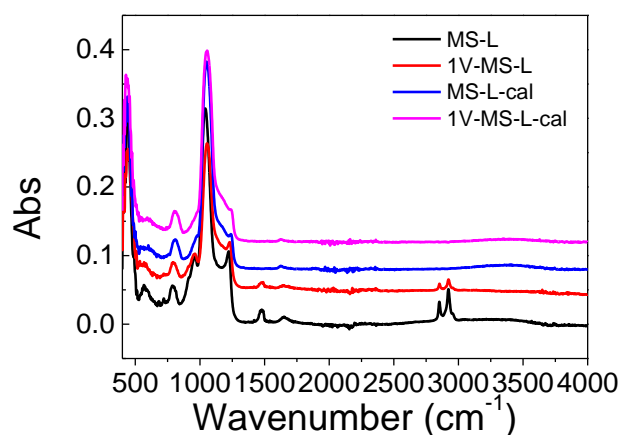

**Figure S7.** FT-IR spectra of as-made **V-MS-L** and **V-MS-L-cal** samples.

From the FT-IR spectra of as-made **V-MS-L** (**Figure S7**), the band at about  $1490\text{ cm}^{-1}$  comes from the C-H bending ( $\delta_{\text{C-H}}$ ) vibrations of surfactant, and the bands in the region of  $2800\text{ cm}^{-1}$  to  $3000\text{ cm}^{-1}$  are derived from the C-H stretching ( $\nu_{\text{C-H}}$ ) vibrations of  $-\text{CH}_3-$  and  $-\text{CH}_2-$  in the surfactant; after calcination at  $550\text{ }^{\circ}\text{C}$  for 6 h, these bands disappeared, indicating total removal of organic surfactant template. The band derived from Si-OH bond stretching vibration of the silanol groups at  $960\text{ cm}^{-1}$  decreased after calcination due to condensation of silanol groups inside the pore walls during calcination. With increasing vanadium loading, bands between  $1000$  and  $1200\text{ cm}^{-1}$  were enhanced due to the stretching vibration of  $\text{V}=\text{O}$ , [1,2] which overlaps with the Si-O-Si asymmetric stretching vibration.[3] The FT-IR spectra of vanadium-incorporated MCM-41 with Ti/Al/Zr/Ce anchors are all in accordance with the bands of **V-MS-L** and **V-MS-L-cal**.

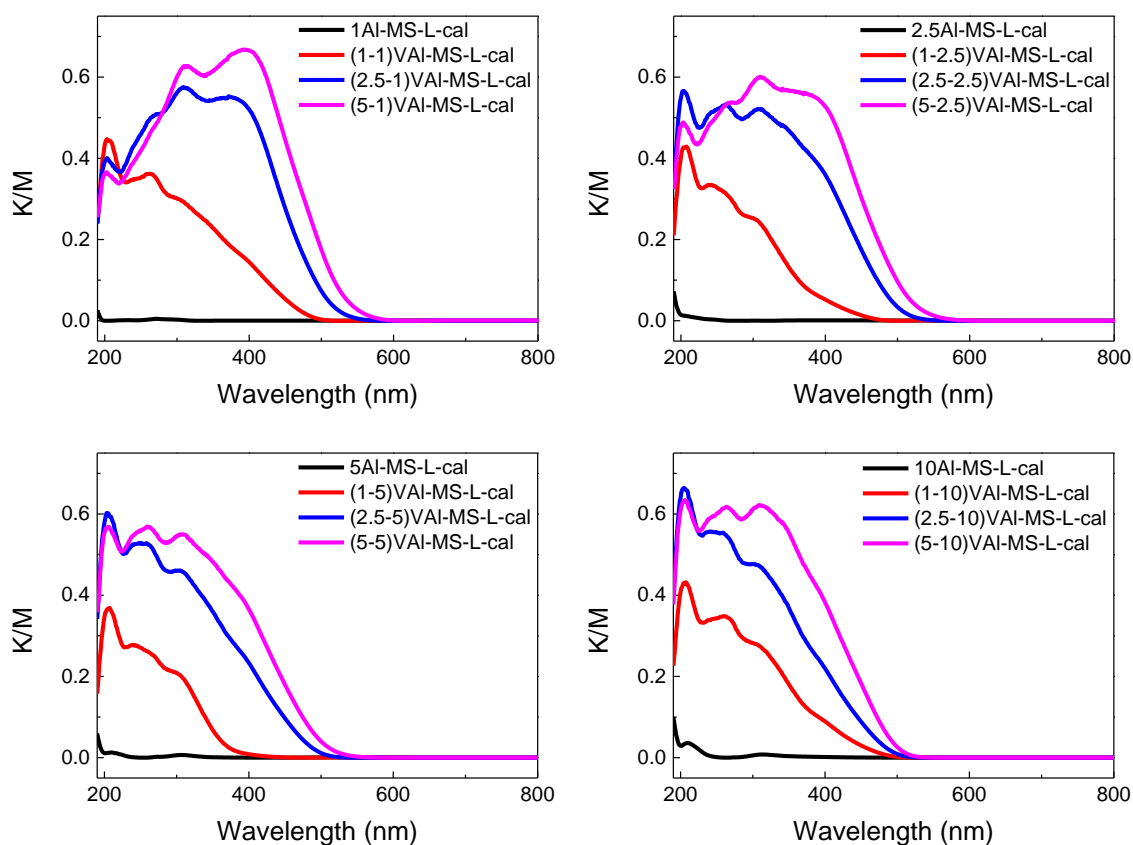

**Figure S8a.** UV-vis spectra of **VAl-MS-L-cal** samples.

**MS-L-cal** was used as blank, and before measurement, samples were diluted in **MS-L-cal** to keep the spectral intensity in the range of 0.2-0.8 Kubelka-Munk (K/M).

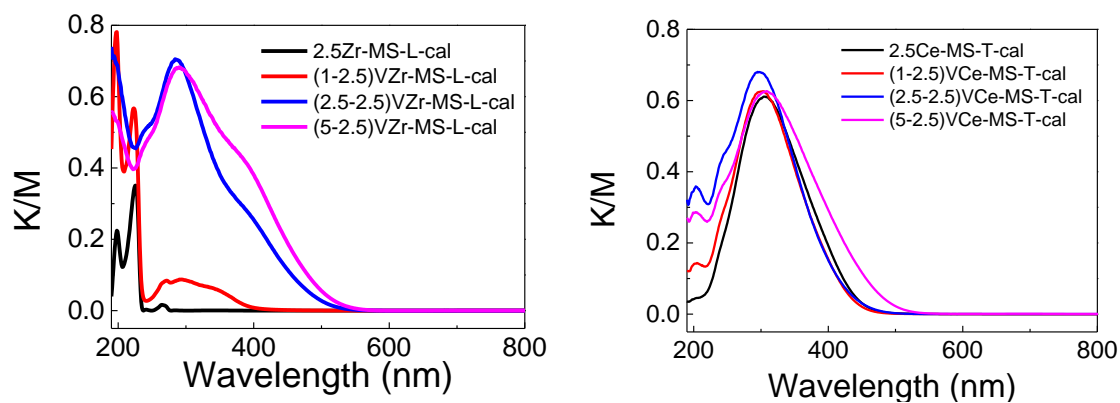

**Figure S8b.** UV-vis spectra of **VZr-MS-L-cal** (left) and **VCe-MS-T-cal** (right).

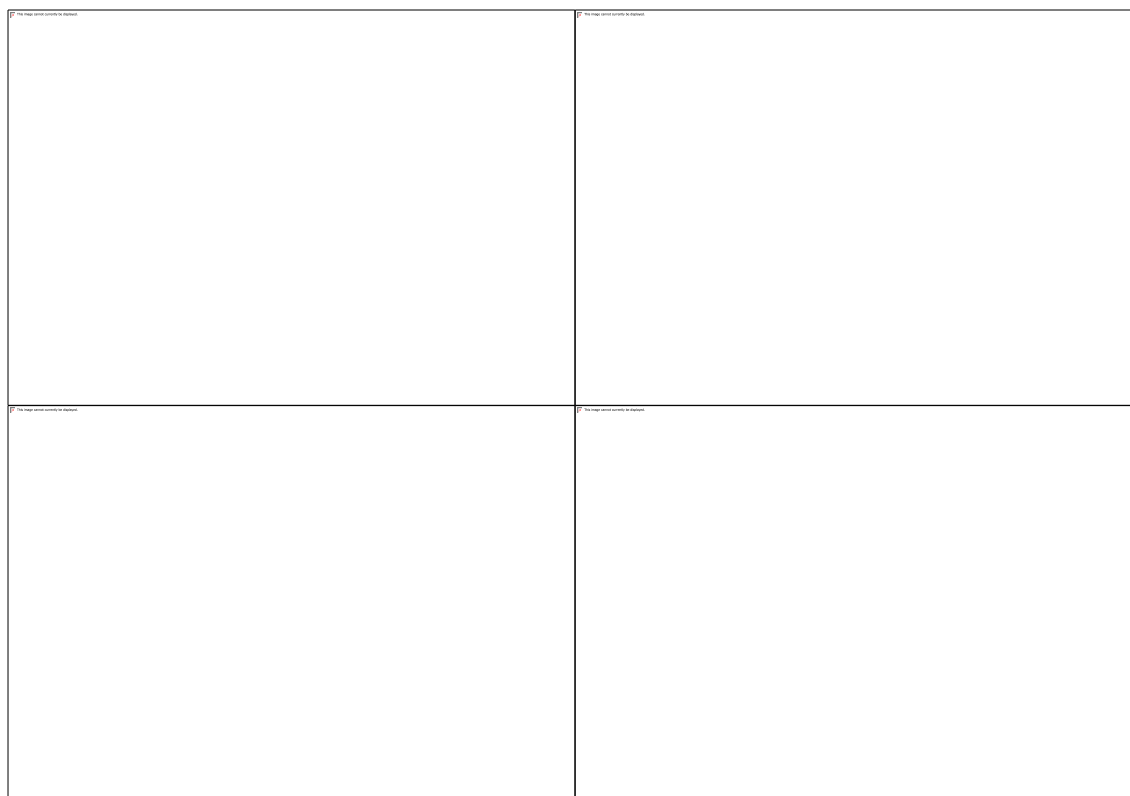

**Figure S9a.** Tauc plot and corresponding edge energy of **VTi-MS-T-cal** samples based on their UV-vis spectra.  $E_g$  obtained by extrapolation of the straight line (black dots).

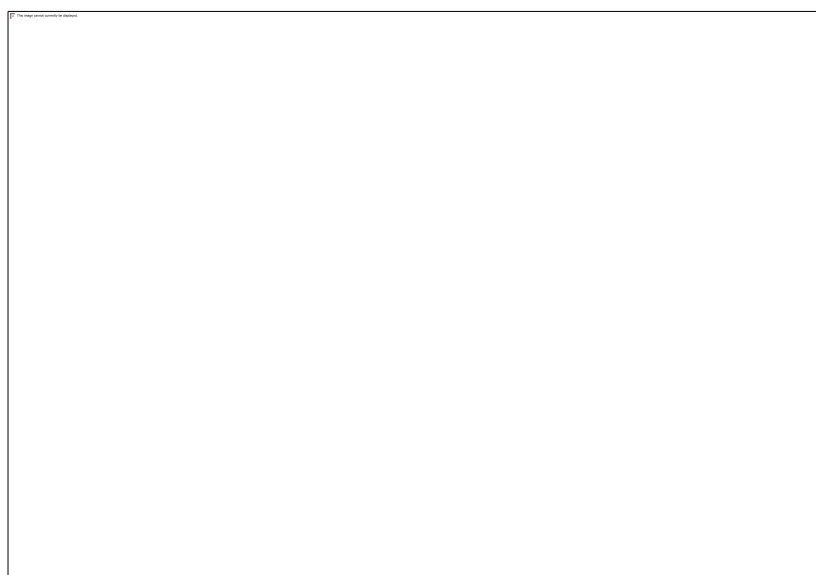

**Figure S9b.** Tauc plot and corresponding edge energy of **VZr-MS-L-cal** samples based on their UV-vis spectra.

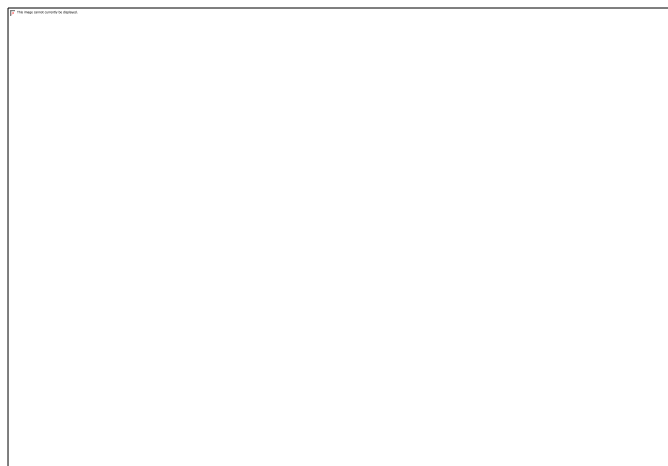

**Figure S9c.** Tauc plot and corresponding edge energy of **VCe-MS-T-cal** samples based on their UV-vis spectra.

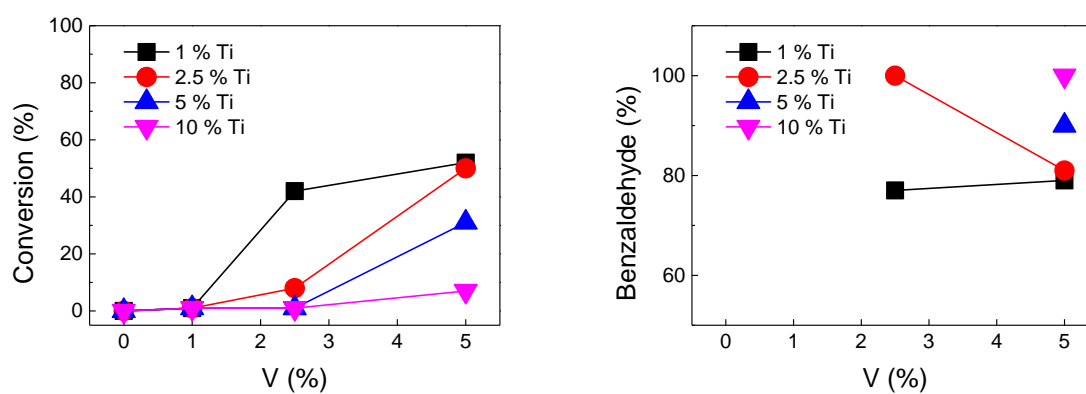

**Figure S10a.** Effect of the nature of the Ti anchor on conversion (a) and selectivity in route a<sub>1</sub> (b).

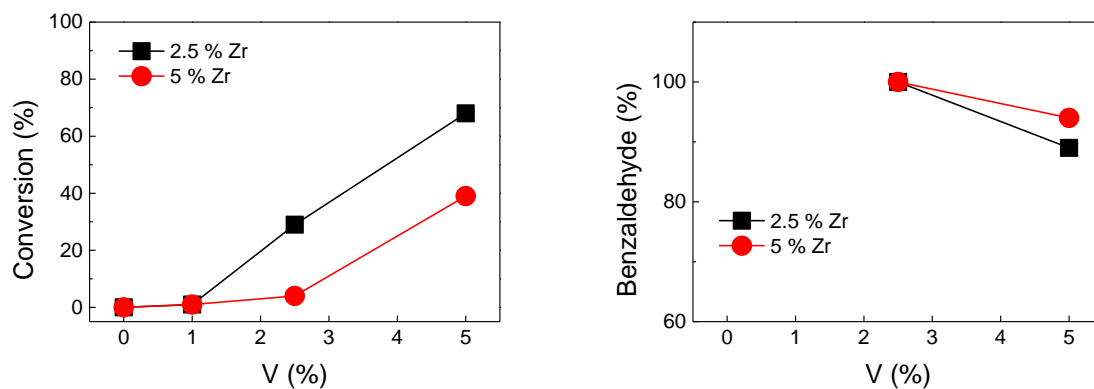

**Figure S10b.** Effect of the nature of the Zr anchor on conversion (a) and selectivity in route  $a_1$  (b).

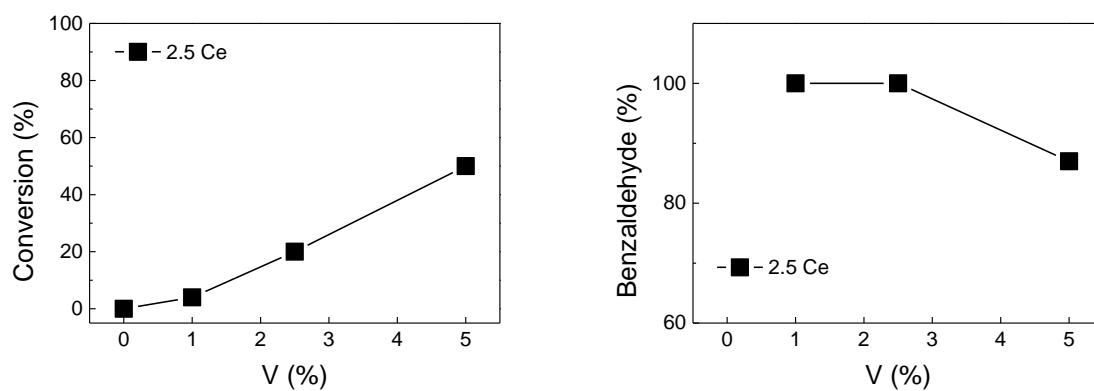

**Figure S10c.** Effect of the nature of the Ce anchor on conversion (a) and selectivity in route  $a_1$  (b).

**Table S1.** Porosity data derived from N<sub>2</sub> adsorption-desorption isotherms for **MS-L** and **V-MS-L-cal** samples.

| Sample             | $a_0^a$<br>(nm) | $V_{\text{total}}^b$<br>(cm <sup>3</sup> g <sup>-1</sup> ) | $V_p^c$<br>(cm <sup>3</sup> g <sup>-1</sup> ) | $S_{\text{BET}}^d$<br>(m <sup>2</sup> g <sup>-1</sup> ) | $d_{\text{HK}}^e$<br>(nm) | $d_{\text{BdB}}^f$<br>(nm) | $T_{\text{w BdB}}^g$<br>(nm) | C  |
|--------------------|-----------------|------------------------------------------------------------|-----------------------------------------------|---------------------------------------------------------|---------------------------|----------------------------|------------------------------|----|
| <b>MS-L-cal</b>    | 4.6             | 1.05                                                       | 0.90                                          | 1107                                                    | 3.0                       | 3.5                        | 1.1                          | 83 |
| <b>1V-MS-L-cal</b> | 4.6             | 1.10                                                       | 0.67                                          | 929                                                     | 3.1                       | 3.6                        | 1.0                          | 81 |

(a) Hexagonal lattice parameter calculated from XRD,  $a_0 = 2d_{100}/1.732$ , accuracy  $\pm 0.1$  nm; (b)  $V_{\text{total}}$  at  $p/p_0 = 0.99$ , accuracy  $\pm 0.01$  cm<sup>3</sup>g<sup>-1</sup>; (c)  $V_p$  at  $P/P_0 = 0$  on the adsorption plateau of t-plot, accuracy  $\pm 0.01$  cm<sup>3</sup>g<sup>-1</sup>; (d) from BET equation at  $0.05 \leq p/p_0 \leq 0.16$ , accuracy  $\pm 50$  m<sup>2</sup>g<sup>-1</sup>; (e) pore diameter extrapolated from Horvath-Kawazoe method, accuracy  $\pm 0.1$  nm; (f) pore diameter extrapolated from Broekhoff and De Boer method, accuracy  $\pm 0.1$  nm; (g) pore wall thickness calculated from  $a_0 - d_{\text{BdB}}$ , accuracy  $\pm 0.2$  nm.

**Table S2(a).** Porosity data of **VTi-MS-T-cal** derived from N<sub>2</sub> sorption isotherms.

| Sample                       | $a_0^a$<br>(nm) | $V_{\text{total}}^b$<br>(cm <sup>3</sup> g <sup>-1</sup> ) | $V_p^c$<br>(cm <sup>3</sup> g <sup>-1</sup> ) | $S_{\text{BET}}^d$<br>(m <sup>2</sup> g <sup>-1</sup> ) | $d_{\text{HK}}^e$<br>(nm) | $d_{\text{BdB}}^f$<br>(nm) | $T_{\text{w BdB}}^g$<br>(nm) | C  |
|------------------------------|-----------------|------------------------------------------------------------|-----------------------------------------------|---------------------------------------------------------|---------------------------|----------------------------|------------------------------|----|
| <b>1Ti-MS-T-cal</b>          | 4.3             | 1.07                                                       | 0.62                                          | 987                                                     | 2.8                       | 3.3                        | 1.0                          | 74 |
| <b>(1-1)VTi-MS-T-cal</b>     | 4.4             | 1.05                                                       | 0.60                                          | 939                                                     | 2.8                       | 3.3                        | 1.1                          | 80 |
| <b>(2.5-1)VTi-MS-T-cal</b>   | 4.4             | 1.13                                                       | 0.58                                          | 893                                                     | 2.8                       | 3.3                        | 1.1                          | 84 |
| <b>(5-1)VTi-MS-T-cal</b>     | 4.8             | 1.26                                                       | 0.53                                          | 825                                                     | 2.8                       | 3.4                        | 1.4                          | 89 |
| <b>2.5Ti-MS-T-cal</b>        | 4.4             | 1.23                                                       | 0.58                                          | 961                                                     | 2.8                       | 3.3                        | 1.1                          | 68 |
| <b>(1-2.5)VTi-MS-T-cal</b>   | 4.4             | 1.20                                                       | 0.54                                          | 900                                                     | 2.8                       | 3.3                        | 1.1                          | 77 |
| <b>(2.5-2.5)VTi-MS-T-cal</b> | 4.5             | 1.28                                                       | 0.53                                          | 879                                                     | 2.8                       | 3.3                        | 1.2                          | 81 |
| <b>(5-2.5)VTi-MS-T-cal</b>   | 4.8             | 1.39                                                       | 0.52                                          | 814                                                     | 2.8                       | 3.3                        | 1.5                          | 82 |
| <b>5Ti-MS-T-cal</b>          | 4.3             | 1.37                                                       | 0.54                                          | 952                                                     | 2.7                       | 3.2                        | 1.1                          | 62 |
| <b>(1-5)VTi-MS-T-cal</b>     | 4.4             | 1.45                                                       | 0.51                                          | 919                                                     | 2.7                       | 3.3                        | 1.1                          | 68 |
| <b>(2.5-5)VTi-MS-T-cal</b>   | 4.4             | 1.38                                                       | 0.50                                          | 890                                                     | 2.8                       | 3.3                        | 1.1                          | 71 |
| <b>(5-5)VTi-MS-T-cal</b>     | 4.9             | 1.47                                                       | 0.47                                          | 837                                                     | 2.8                       | 3.3                        | 1.6                          | 76 |
| <b>10Ti-MS-T-cal</b>         | 4.3             | 1.31                                                       | 0.47                                          | 939                                                     | 2.6                       | 3.1                        | 1.2                          | 51 |
| <b>(1-10)VTi-MS-T-cal</b>    | 4.2             | 1.43                                                       | 0.44                                          | 897                                                     | 2.7                       | 3.3                        | 0.9                          | 57 |
| <b>(2.5-10)VTi-MS-T-cal</b>  | 4.4             | 1.41                                                       | 0.45                                          | 867                                                     | 2.7                       | 3.3                        | 1.1                          | 62 |
| <b>(5-10)VTi-MS-T-cal</b>    | 4.7             | 1.54                                                       | 0.43                                          | 831                                                     | 2.7                       | 3.3                        | 1.4                          | 64 |

(a) Same as Table S1

**Table S2(b).** Porosity data of **VAI-MS-L-cal** derived from N<sub>2</sub> sorption isotherms.

| Sample                       | $a_0^a$<br>(nm) | $V_{total}^b$<br>(cm <sup>3</sup> g <sup>-1</sup> ) | $V_p^c$<br>(cm <sup>3</sup> g <sup>-1</sup> ) | $S_{BET}^d$<br>(m <sup>2</sup> g <sup>-1</sup> ) | $d_{HK}^e$<br>(nm) | $d_{BdB}^f$<br>(nm) | $T_{w_{BdB}}^g$<br>(nm) | C  |
|------------------------------|-----------------|-----------------------------------------------------|-----------------------------------------------|--------------------------------------------------|--------------------|---------------------|-------------------------|----|
| <b>1Al-MS-L-cal</b>          | 4.5             | 1.41                                                | 0.76                                          | 1108                                             | 3.2                | 3.6                 | 0.9                     | 57 |
| <b>(1-1)VAI-MS-L-cal</b>     | 4.6             | 1.54                                                | 0.83                                          | 1082                                             | 3.3                | 3.7                 | 0.9                     | 68 |
| <b>(2.5-1)VAI-MS-L-cal</b>   | 4.7             | 1.74                                                | 0.74                                          | 1044                                             | 3.3                | 3.7                 | 1.0                     | 79 |
| <b>(5-1)VAI-MS-L-cal</b>     | 4.7             | 1.34                                                | 0.70                                          | 926                                              | 3.2                | 3.7                 | 1.0                     | 82 |
| <b>2.5Al-MS-L-cal</b>        | 4.7             | 1.62                                                | 0.67                                          | 985                                              | 3.2                | 3.7                 | 1.0                     | 68 |
| <b>(1-2.5)VAI-MS-L-cal</b>   | 4.6             | 1.67                                                | 0.66                                          | 975                                              | 3.2                | 3.7                 | 0.9                     | 80 |
| <b>(2.5-2.5)VAI-MS-L-cal</b> | 4.7             | 1.62                                                | 0.64                                          | 916                                              | 3.2                | 3.7                 | 1.0                     | 89 |
| <b>(5-2.5)VAI-MS-L-cal</b>   | 4.8             | 1.26                                                | 0.62                                          | 852                                              | 3.2                | 3.6                 | 1.2                     | 90 |
| <b>5Al-MS-L-cal</b>          | 4.9             | 1.57                                                | 0.56                                          | 827                                              | 3.2                | 3.7                 | 1.2                     | 84 |
| <b>(1-5)VAI-MS-L-cal</b>     | 4.9             | 1.52                                                | 0.57                                          | 822                                              | 3.2                | 3.6                 | 1.3                     | 87 |
| <b>(2.5-5)VAI-MS-L-cal</b>   | 4.8             | 1.45                                                | 0.53                                          | 776                                              | 3.2                | 3.6                 | 1.2                     | 92 |
| <b>(5-5)VAI-MS-L-cal</b>     | 5.0             | 1.34                                                | 0.48                                          | 725                                              | 3.1                | 3.6                 | 1.4                     | 92 |
| <b>10Al-MS-L-cal</b>         | #               | 1.46                                                | 0.34                                          | 652                                              | 3.0                | 3.5                 | #                       | 86 |
| <b>(1-10)VAI-MS-L-cal</b>    | #               | 1.51                                                | 0.34                                          | 690                                              | 3.0                | 3.5                 | #                       | 78 |
| <b>(2.5-10)VAI-MS-L-cal</b>  | #               | 1.39                                                | 0.30                                          | 672                                              | 2.9                | 3.4                 | #                       | 74 |
| <b>(5-10)VAI-MS-L-cal</b>    | #               | 0.77                                                | 0.23                                          | 640                                              | #                  | #                   | #                       | 64 |

**Table S2 (c).** Porosity data of **VZr-MS-L-cal** and **VCe-MS-L-cal**.

| Sample                       | $a_0^a$<br>(nm) | $V_{total}^b$<br>(cm <sup>3</sup> g <sup>-1</sup> ) | $V_p^c$<br>(cm <sup>3</sup> g <sup>-1</sup> ) | $S_{BET}^d$<br>(m <sup>2</sup> g <sup>-1</sup> ) | $d_{HK}^e$<br>(nm) | $d_{BdB}^f$<br>(nm) | $T_{w_{BdB}}^g$<br>(nm) | C  |
|------------------------------|-----------------|-----------------------------------------------------|-----------------------------------------------|--------------------------------------------------|--------------------|---------------------|-------------------------|----|
| <b>2.5Zr-MS-L-cal</b>        | 4.4             | 1.47                                                | 0.59                                          | 905                                              | 2.9                | 3.6                 | 0.8                     | 78 |
| <b>(1-2.5)VZr-MS-L-cal</b>   | 4.5             | 1.26                                                | 0.62                                          | 907                                              | 3.2                | 3.7                 | 0.8                     | 80 |
| <b>(2.5-2.5)VZr-MS-L-cal</b> | 4.5             | 1.28                                                | 0.75                                          | 1009                                             | 3.2                | 3.7                 | 0.8                     | 79 |
| <b>(5-2.5)VZr-MS-L-cal</b>   | 4.6             | 0.97                                                | 0.54                                          | 745                                              | 3.2                | 3.7                 | 0.9                     | 80 |
| <b>2.5Ce-MS-T-cal</b>        | 4.3             | 1.08                                                | 0.58                                          | 870                                              | 2.8                | 3.5                 | 0.8                     | 91 |
| <b>(1-2.5)VCe-MS-T-cal</b>   | 4.6             | 1.12                                                | 0.58                                          | 876                                              | 2.8                | 3.5                 | 1.1                     | 90 |
| <b>(2.5-2.5)VCe-MS-T-cal</b> | 4.5             | 1.19                                                | 0.54                                          | 838                                              | 2.8                | 3.5                 | 1.0                     | 94 |
| <b>(5-2.5)VCe-MS-T-cal</b>   | 4.7             | 1.60                                                | 0.47                                          | 781                                              | 2.8                | 3.5                 | 1.2                     | 92 |



**Table S3.**  $^{27}\text{Al}$  NMR analysis of as-prepared **Al-MS-L** and **VAI-MS-L** samples.

| Sample                 | Al (tet) | Al (oct) | Al (penta) |
|------------------------|----------|----------|------------|
| <b>1Al-MS-L</b>        | 100      | 0        | 0          |
| <b>(1-1)VAI-MS-L</b>   | 100      | 0        | 0          |
| <b>2.5Al-MS-L</b>      | 100      | 0        | 0          |
| <b>(1-2.5)VAI-MS-L</b> | 100      | 0        | 0          |
| <b>5Al-MS-L</b>        | 99.2     | 0.8      | 0          |
| <b>(1-5)VAI-MS-L</b>   | 99.5     | 0.5      | 0          |
| <b>10Al-MS-L</b>       | 97.7     | 2.3      | 0          |
| <b>(1-10)VAI-MS-L</b>  | 99.4     | 0.6      | 0          |

**Table S4.**  $^{29}\text{Si}$  quantitative NMR analysis of as-prepared samples with V and Ti/Al/Zr/Ce anchors.

| Sample                   | Q <sup>4</sup> | width | Q <sup>3</sup> | width | Q <sup>2</sup> | Width |
|--------------------------|----------------|-------|----------------|-------|----------------|-------|
| <b>MS-L</b>              | 64             | 8.5   | 31             | 6.5   | 5              | 6.7   |
| <b>2.5V-MS-L</b>         | 61             | 8.7   | 33             | 8.4   | 6              | 6.7   |
| <b>2.5Ti-MS-T</b>        | 50             | 8.9   | 42             | 7.8   | 8              | 6.7   |
| <b>2.5Al-MS-L</b>        | 48             | 9.6   | 43             | 8.2   | 9              | 6.7   |
| <b>2.5Zr-MS-L</b>        | 45             | 8.4   | 47             | 8.4   | 8              | 6.7   |
| <b>2.5Ce-MS-T</b>        | 53             | 9.2   | 40             | 7.5   | 7              | 6.7   |
| <b>(2.5-2.5)VTi-MS-T</b> | 50             | 8.7   | 43             | 8.4   | 7              | 6.7   |
| <b>(2.5-2.5)VAI-MS-L</b> | 54             | 9.8   | 39             | 8.5   | 7              | 6.7   |
| <b>(2.5-2.5)VZr-MS-L</b> | 51             | 9.0   | 40             | 9.0   | 9              | 6.7   |
| <b>(2.5-2.5)VCe-MS-T</b> | 52             | 8.6   | 41             | 8.3   | 7              | 6.7   |

Q<sup>4</sup> (-109 ppm, silicon coordinated with four oxygen atoms), Q<sup>3</sup> (-99 ppm, each silicon atom coordinated with three oxygen atoms and one hydroxy group), and Q<sup>2</sup> (-91 ppm, each silicon atom coordinated with two oxygen atoms and two hydroxy groups).[4]

**Table S5a.**  $E_g$  from Tauc plots of Fig.S10a.

| Sample                       | Energy (eV) |
|------------------------------|-------------|
| <b>1Ti-MS-T-cal</b>          | -           |
| <b>(1-1)VTi-MS-T-cal</b>     | 3.77        |
| <b>(2.5-1)VTi-MS-T-cal</b>   | 2.87        |
| <b>(5-1)VTi-MS-T-cal</b>     | 2.57        |
| <b>2.5Ti-MS-T-cal</b>        | -           |
| <b>(1-2.5)VTi-MS-T-cal</b>   | 3.71        |
| <b>(2.5-2.5)VTi-MS-T-cal</b> | 3.56        |
| <b>(5-2.5)VTi-MS-T-cal</b>   | 2.85        |
| <b>5Ti-MS-T-cal</b>          | -           |
| <b>(1-5)VTi-MS-T-cal</b>     | 3.79        |
| <b>(2.5-5)VTi-MS-T-cal</b>   | 3.65        |
| <b>(5-5)VTi-MS-T-cal</b>     | 3.36        |
| <b>10Ti-MS-T-cal</b>         | -           |
| <b>(1-10)VTi-MS-T-cal</b>    | 3.84        |
| <b>(2.5-10)VTi-MS-T-cal</b>  | 3.65        |
| <b>(5-10)VTi-MS-T-cal</b>    | 3.42        |

**Table S5b.**  $E_g$  from Tauc plots of Fig.S10b.

| Sample                       | Energy (eV) |
|------------------------------|-------------|
| <b>1Al-MS-L-cal</b>          | -           |
| <b>(1-1)VAI-MS-L-cal</b>     | 2.80        |
| <b>(2.5-1)VAI-MS-L-cal</b>   | 2.52        |
| <b>(5-1)VAI-MS-L-cal</b>     | 2.38        |
| <b>2.5Al-MS-L-cal</b>        | -           |
| <b>(1-2.5)VAI-MS-L-cal</b>   | 3.24        |
| <b>(2.5-2.5)VAI-MS-L-cal</b> | 2.57        |
| <b>(5-2.5)VAI-MS-L-cal</b>   | 2.46        |
| <b>5Al-MS-L-cal</b>          | -           |
| <b>(1-5)VAI-MS-L-cal</b>     | 3.49        |
| <b>(2.5-5)VAI-MS-L-cal</b>   | 2.69        |
| <b>(5-5)VAI-MS-L-cal</b>     | 2.55        |
| <b>10Al-MS-L-cal</b>         | -           |
| <b>(1-10)VAI-MS-L-cal</b>    | 2.84        |
| <b>(2.5-10)VAI-MS-L-cal</b>  | 2.65        |
| <b>(5-10)VAI-MS-L-cal</b>    | 2.56        |

**Table S5c.** E<sub>g</sub> from Tauc plots of Fig.S10b and Fig 10d.

| Sample                       | Energy (eV) |
|------------------------------|-------------|
| <b>2.5Zr-MS-L-cal</b>        | -           |
| <b>(1-2.5)VZr-MS-L-cal</b>   | 2.90        |
| <b>(2.5-2.5)VZr-MS-L-cal</b> | 2.65        |
| <b>(5-2.5)VZr-MS-L-cal</b>   | 2.55        |
| <b>5Zr-MS-L-cal</b>          | -           |
| <b>(1-5)VZr-MS-L-cal</b>     | 3.38        |
| <b>(2.5-5)VZr-MS-L-cal</b>   | 2.74        |
| <b>(5-5)VZr-MS-L-cal</b>     | 2.69        |
| <b>(5-2.5)VCe-MS-T-cal</b>   | 2.56        |

**Table S6a.** High throughput screening of 1,2-diphenyl-2-methoxyethanol oxidation using Ti anchoring ions.

| Catalysts                    | Conversion | Selectivity (%) |                 |          |                      |
|------------------------------|------------|-----------------|-----------------|----------|----------------------|
|                              | (%)        | Benzaldehyde    | Methyl benzoate | Methanol | Benzoin methyl ether |
| <b>1Ti-MS-T-cal</b>          | 0          | -               | -               | -        | -                    |
| <b>(1-1)VTi-MS-T-cal</b>     | <1         | -               | -               | -        | -                    |
| <b>(2.5-1)VTi-MS-T-cal</b>   | 42         | 77              | 11              | 0        | 12                   |
| <b>(5-1)VTi-MS-T-cal</b>     | 52         | 79              | 8               | 6        | 7                    |
| <b>2.5Ti-MS-T-cal</b>        | 0          | -               | -               | -        | -                    |
| <b>(1-2.5)VTi-MS-T-cal</b>   | <1         | -               | -               | -        | -                    |
| <b>(2.5-2.5)VTi-MS-T-cal</b> | 8          | 100             | 0               | 0        | 0                    |
| <b>(5-2.5)VTi-MS-T-cal</b>   | 50         | 81              | 6               | 6        | 7                    |
| <b>5Ti-MS-T-cal</b>          | 0          | -               | -               | -        | -                    |
| <b>(1-5)VTi-MS-T-cal</b>     | <1         | -               | -               | -        | -                    |
| <b>(2.5-5)VTi-MS-T-cal</b>   | <1         | -               | -               | -        | -                    |
| <b>(5-5)VTi-MS-T-cal</b>     | 31         | 90              | 0               | 0        | 10                   |
| <b>10Ti-MS-T-cal</b>         | 0          | -               | -               | -        | -                    |
| <b>(1-10)VTi-MS-T-cal</b>    | <1         | -               | -               | -        | -                    |
| <b>(2.5-10)VTi-MS-T-cal</b>  | <1         | -               | -               | -        | -                    |
| <b>(5-10)VTi-MS-T-cal</b>    | 7          | 100             | 0               | 0        | 0                    |

**Table S6b.** High throughput screening of 1,2-diphenyl-2-methoxyethanol oxidation using Zr and Ce anchoring ions.

| Catalysts                         | Conversion | Selectivity (%) |                 |          |                      |
|-----------------------------------|------------|-----------------|-----------------|----------|----------------------|
|                                   | (%)        | Benzaldehyde    | Methyl benzoate | Methanol | Benzoin methyl ether |
| <b>2.5Zr<sub>N</sub>-MS-L-cal</b> | 0          | -               | -               | -        | -                    |
| <b>(1-2.5)VZr-MS-L-cal</b>        | <1         | -               | -               | -        | -                    |
| <b>(2.5-2.5)VZr-MS-L-cal</b>      | 29         | 100             | -               | -        | 0                    |
| <b>(5-2.5)VZr-MS-L-cal</b>        | 68         | 89              | 0               | 6        | 5                    |
| <b>5Zr-MS-L-cal</b>               | 0          | -               | -               | -        | -                    |
| <b>(1-5)VZr-MS-L-cal</b>          | <1         | -               | -               | -        | -                    |
| <b>(2.5-5)VZr-MS-L-cal</b>        | 4          | 100             | 0               | 0        | 0                    |
| <b>(5-5)VZr-MS-L-cal</b>          | 39         | 94              | 0               | 0        | 6                    |
| <b>2.5Ce-MS-T-cal</b>             | 0          | -               | -               | -        | -                    |
| <b>(1-2.5)VCe-MS-T-cal</b>        | 4          | 100             | 0               | 0        | 0                    |
| <b>(2.5-2.5)VCe-MS-T-cal</b>      | 20         | 100             | 0               | 0        | 0                    |
| <b>(5-2.5)VCe-MS-T-cal</b>        | 50         | 87              | 6               | 7        | 0                    |

**Table S7.** Oxidation of 1,2-diphenyl-2-methoxyethanol in different solvents via vanadium catalyst **(5-1)VAI-MS-L-cal**.

| No. | Solvent                         | Boiling Point (°C) | Polarity   | Conversion (%) | Selectivity to Benzaldehyde (%) |
|-----|---------------------------------|--------------------|------------|----------------|---------------------------------|
| 1   | Chloroform                      | 61                 | 4.4        | 93             | 65                              |
| 2   | Benzene                         | 80                 | 3.0        | 92             | 79                              |
| 3   | EtOAc                           | 77                 | 4.3        | 83             | > 95                            |
| 4   | Toluene                         | 111                | 2.4        | 70             | > 95                            |
| 5   | MeCN                            | 82                 | 6.2        | 72             | 89                              |
| 6   | CH <sub>2</sub> Cl <sub>2</sub> | 40                 | 3.4        | 69             | 63                              |
| 7   | Dioxane                         | 101                | 4.8        | 27             | 72                              |
| 8   | THF                             | 66                 | 4.2        | 23             | 57                              |
| 9   | DMSO                            | 189                | 7.2        | 14             | 49                              |
| 10  | Pyridine                        | 115                | 5.3        | < 5            | -                               |
| 11  | Ethanol (95 %)                  | 78                 | 4.3        | < 5            | -                               |
| 12  | H <sub>2</sub> O (+MeCN)        | 100                | 10.2 (6.2) | < 5            | -                               |

**Table S8.** Recycling test of **(2.5-2.5)VAI-MS-L-cal** for 1,2-diphenyl-2-methoxyethanol oxidation in acetonitrile.

| Catalysts                                | Conversion | Selectivity (%) |                 |          |              |                      |
|------------------------------------------|------------|-----------------|-----------------|----------|--------------|----------------------|
|                                          | (%)        | Benzaldehyde    | Methyl benzoate | Methanol | Benzoic acid | Benzoin methyl ether |
| <b>(2.5-2.5)VAI-MS-L-1st</b>             | 49         | 84              | 10              | 6        | 0            | 0                    |
| <b>(2.5-2.5)VAI-MS-L-2<sup>nd</sup></b>  | 46         | 81              | 12              | 4        | 0            | 3                    |
| <b>(2.5-2.5)VAI-MS-L-3<sup>rd</sup></b>  | 43         | 79              | 13              | 5        | 0            | 3                    |
| <b>(2.5-2.5)VAI-MS-L-4<sup>th</sup></b>  | 39         | 78              | 14              | 5        | 0            | 3                    |
| <b>(2.5-2.5)VAI-MS-L-cal<sup>a</sup></b> | 32         | 76              | 19              | 0        | 0            | 5                    |

a) After leaching in MeOH.

## References

- [1] Chen, Y.; Yang, G.; Zhang, Z.; Yang, X.; Hou, W.; Zhu, J.-J. Polyaniline-intercalated layered vanadium oxide nanocomposites—One-pot hydrothermal synthesis and application in lithium battery. *Nanoscale* **2010**, *2*, 2131-2138.
- [2] Sanchez, C.; Livage, J.; Lucazeau, G. Infrared and Raman study of amorphous V<sub>2</sub>O<sub>5</sub>. *J. Raman Spect.* **1982**, *12*, 68-72.
- [3] Parambadath, S.; Mathew, A.; Park, S.S.; Ha, C.-S. Pentane-1, 2-dicarboxylic acid functionalized spherical MCM-41: A simple and highly selective heterogeneous ligand for the adsorption of Fe<sup>3+</sup> from aqueous solutions. *J. Environ. Chem. Eng.* **2015**, *3*, 1918-1927.
- [4] Chaignon, J.; Bouizi, Y.; Davin, L.; Calin, N.; Albela, B.; Bonneviot, L. Minute-made and low carbon fingerprint microwave synthesis of high quality templated mesoporous silica. *Green Chem.* **2015**, *17*, 3130-3140.
